# Supplementary material for: Enrichment in Antioxidant Flavonoids of Stamen Extracts from Nymphaea lotus L. Using Ultrasonic-Assisted Extraction and Macroporous Resin Adsorption
Source: PubMed Central journal article supplement (PMC7402147; doi:10.3390/antiox9070576), 2020-07-02
Supplement: antioxidants-09-00576-s001.pdf [file antioxidants-09-00576-s001.pdf]

## SUPPLEMENTARY MATERIALS

---

# Enrichment in Antioxidant Flavonoids of Stamen Extracts from *Nymphaea lotus* L. using Ultrasonic-Assisted Extraction and Macroporous Resin Adsorption

Duangjai Tungmunnithum <sup>1,2,3,\*</sup>, Samantha Drouet <sup>2,3</sup>, Atul Kabra <sup>4</sup>, and Christophe Hano <sup>2,3,\*</sup>

<sup>1</sup> Department of Pharmaceutical Botany, Faculty of Pharmacy, Mahidol University, Bangkok 10400, Thailand; duangjai.tun@mahidol.ac.th (D.T.);

<sup>2</sup> Laboratoire de Biologie des Ligneux et des Grandes Cultures, INRA USC1328, University of Orleans, 45067 Orléans CEDEX 2, France; samantha.drouet@univ-orleans.fr (S.D.)

<sup>3</sup> Bioactifs et Cosmetiques, CNRS GDR 3711 Orleans, 45067 Orléans CEDEX 2, France

<sup>4</sup> School of Pharmacy, Raffles University, Neemrana 301705, Alwar, Rajasthan, India; atul.kbr@gmail.com

\* Correspondence: [duangjai.tun@mahidol.ac.th](mailto:duangjai.tun@mahidol.ac.th) (D.T.); [hano@univ-orleans.fr](mailto:hano@univ-orleans.fr) (C.H.); Tel.: +66-264-486-96 (D.T.); +33-237-309-753 (C.H.)

### CONTENT:

**Figure S1:** Biplot representation of the linear relation between predicted vs. measured TFC in the 27 *N. lotus* sample extracts – page 2.

**Figure S2:** Normalized coefficients plot with the 95% CI interval for the proposed polynomial model – page 3.

**Table S1:** Conductivity and total reducing sugar contents in the different extracts from *N. lotus* stamen – page 4.

**Table S2:** Characteristic and tentative identification of flavonoids from *N. lotus* stamen extract – page 5.

**Figure S1:** Biplot representation of the linear relation between predicted vs. measured TFC in the 27 *N. lotus* sample extracts.

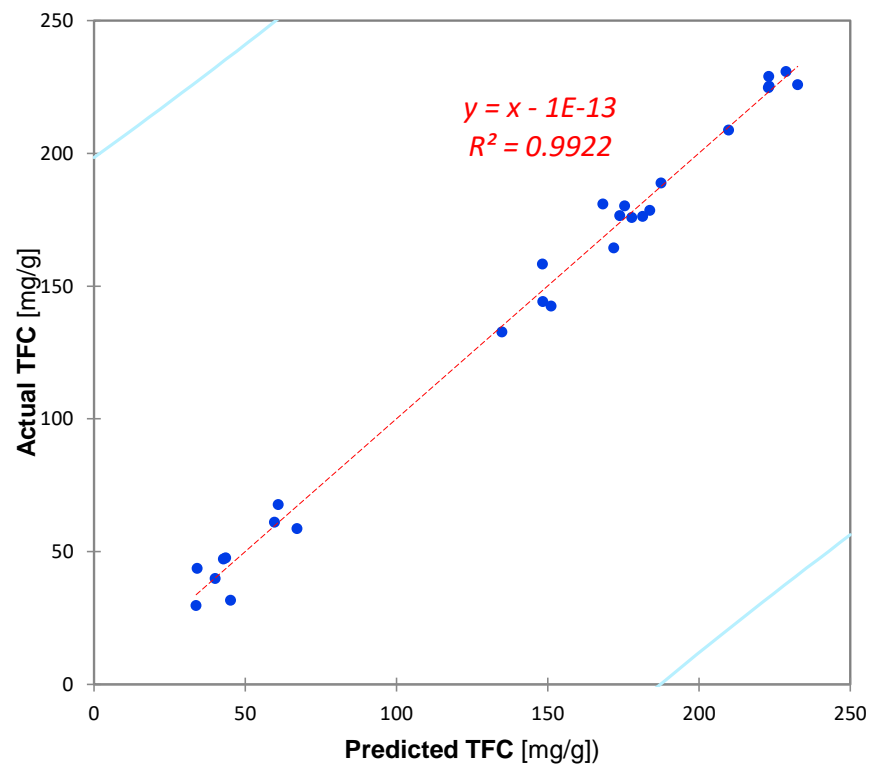

Light blue lines represented 95% confidence interval.

**Figure S2:** Normalized coefficients representation with the 95% CI for the proposed polynomial model.

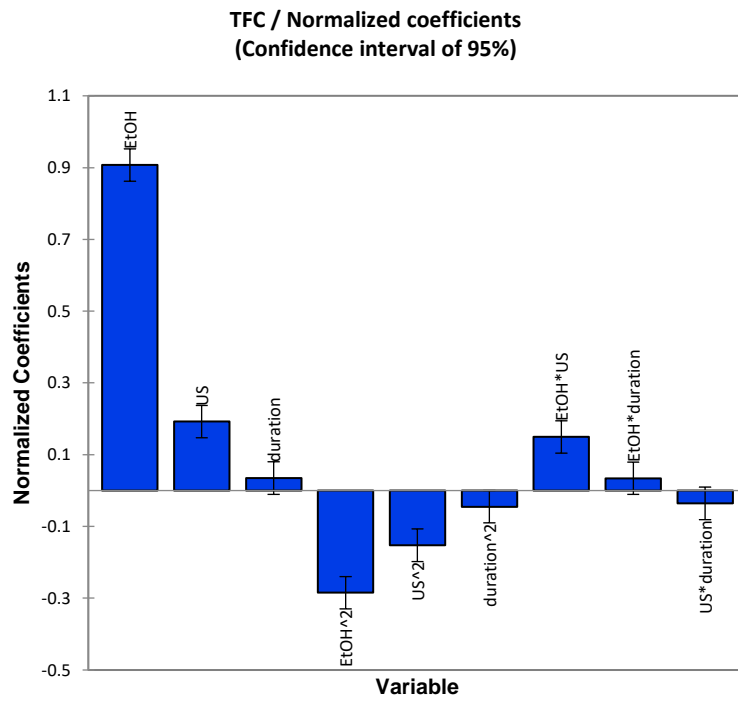

**Table S1:** Conductivity and total reducing sugar contents in the different extracts from *N. lotus* stamen.

| <b>Extract</b> | <b>Conductivity</b><br>( $\mu\text{S}/\text{cm}$ ) | <b>Reducing sugar content</b><br>( $\text{AU}/\text{mL}^1$ ) |
|----------------|----------------------------------------------------|--------------------------------------------------------------|
| HRE            | $0.039 \pm 0.005$                                  | $0.056 \pm 0.011$                                            |
| USAE           | $0.122 \pm 0.010$                                  | $0.065 \pm 0.010$                                            |
| MPR            | $0.044 \pm 0.012$                                  | $0.007 \pm 0.006$                                            |

<sup>1</sup> AU/mL: expressed in absorbance unit per mL of extract; HRE: *N. lotus* extract obtained by HRE; USAE: *N. lotus* extract obtained by USAE; MPR: *N. lotus* extract obtained by USAE followed by DAX-8 MPR purification step.

**Table S2:** Characteristic and tentative identification of flavonoids from *N. lotus* stamen extract

| Peak number | Retention time (min) | $\lambda_{max}$ (nm) | [M-H] <sup>-</sup> | Tentative identification | Commercial standard | Reference                             |
|-------------|----------------------|----------------------|--------------------|--------------------------|---------------------|---------------------------------------|
| 1           | 29.11                | 263,349              | 479                | Myr 3-O-Gal              | +<br>(ES)           | Zhu et al., 2012                      |
| 2           | 31.67                | 254,305,366          | 449                | Myr 3'-O-Xyl             | -                   | Zhu et al., 2012                      |
| 3           | 32.26                | 257,348              | 447                | Que-3-O-Rha              | +<br>(SA)           | Zhu et al., 2012;<br>Yin et al., 2015 |
| 4           | 32.87                | 250,366              | 433                | CNar-2''-O-Gal           | -                   | Zhu et al., 2012;<br>Yin et al., 2015 |
| 5           | 33.52                | 265,343              | 447                | Kae-3-O-Gal              | +<br>(SA)           | Zhu et al., 2012                      |
| 6           | 33.91                | 254,366              | 433                | Que-3'-O-Xyl             | +<br>(SA)           | Zhu et al., 2012                      |
| 7           | 34.71                | 268,350              | 477                | Iso-7-O-Gal              | -                   | Zhu et al., 2012;<br>Yin et al., 2015 |
| 8           | 35.51                | 252,268,352          | 447                | Iso-7-O-Xyl              | -                   | Zhu et al., 2012;<br>Yin et al., 2015 |
| 9           | 36.57                | 265, 343             | 447                | Iso-3-O-Xyl              | -                   | Yin et al., 2015                      |

Myr: myricetin; Que: quercetin; CNar: chalcononaringenin; Kae: kaempferol; Iso: isorhamnetin; Gal: galactoside; Xyl: xyloside; Rha: rhamnoside. Standards: + = available; - = not available; ES = commercial standard from Extrasynthese (Genay, France); SA = commercial standard from Sigma-Aldrich (Saint-Quentin Fallavier, France); Commercial standards from Sigma-Aldrich (Saint-Quentin Fallavier, France): Que-3-O-Rha, phyproof<sup>®</sup> Reference Substance, with purity  $\geq 95.0\%$  (HPLC); Que-3'-O-Xyl with purity  $\geq 97.0\%$  (HPLC); Kae-3-O-Gal with purity  $\geq 90\%$  (LC/MS-ELSD); Commercial standard from Extrasynthese (Genay, France): Myr 3-O-Gal with purity  $\geq 99\%$  (HPLC). References: Zhu et al., 2012 (reference 14, main manuscript): Zhu, M., Zheng, X., Shu, Q., Li, H., Zhong, P., Zhang, H., ... & Wang, L. (2012). Relationship between the composition of flavonoids and flower colors variation in tropical water lily (*Nymphaea*) cultivars. *PLoS one*, 7(4); Yin et al., 2015 (reference 4, main manuscript): Yin, D. D., Yuan, R. Y., Wu, Q., Li, S. S., Shao, S., Xu, Y. J., ... & Wang, L. S. (2015). Assessment of flavonoids and volatile compounds in tea infusions of water lily flowers and their antioxidant activities. *Food chemistry*, 187, 20-28.
